# Supplementary material for: Divergent responses of the coral holobiont to deoxygenation and prior environmental stress
Source: Frontiers journal article supplement (doi:10.3389/fmars.2023.1301474), 2024-02-01
Supplement: Data_Sheet_1.pdf [file Data_Sheet_1.pdf]

## *Supplementary Material*

### **Divergent responses of the coral holobiont to deoxygenation and prior environmental stress**

Sara D. Swaminathan\*, Julie L. Meyer, Maggie D. Johnson, Valerie J. Paul, Erich Bartels, Andrew H. Altieri

\* **Correspondence:** Sara Swaminathan: saradeviswaminathan@gmail.com

#### **Supplementary Figures**

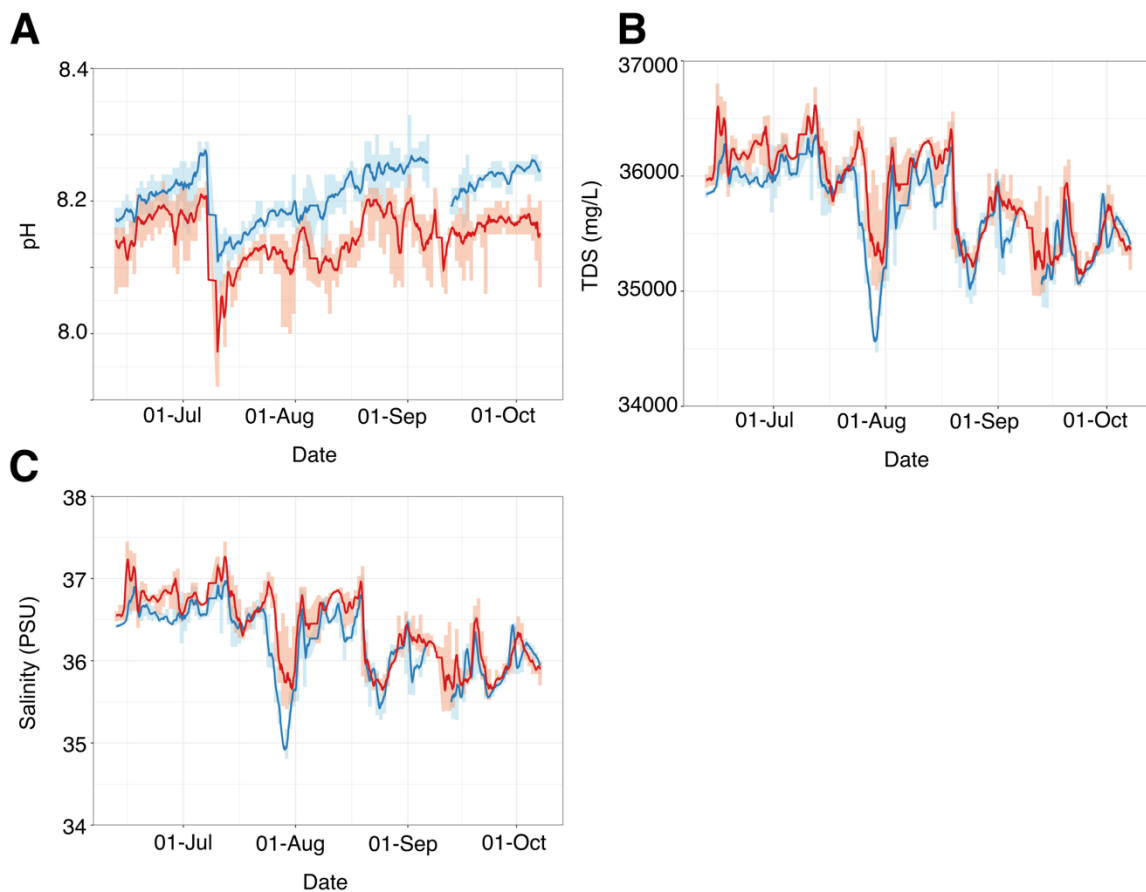

**Supplementary Figure S1.** Environmental parameters measured at the inshore (red lines) and offshore (blue lines) sites during the 2019 summer. (A) pH, (B) Total dissolved solids, and (C) salinity.

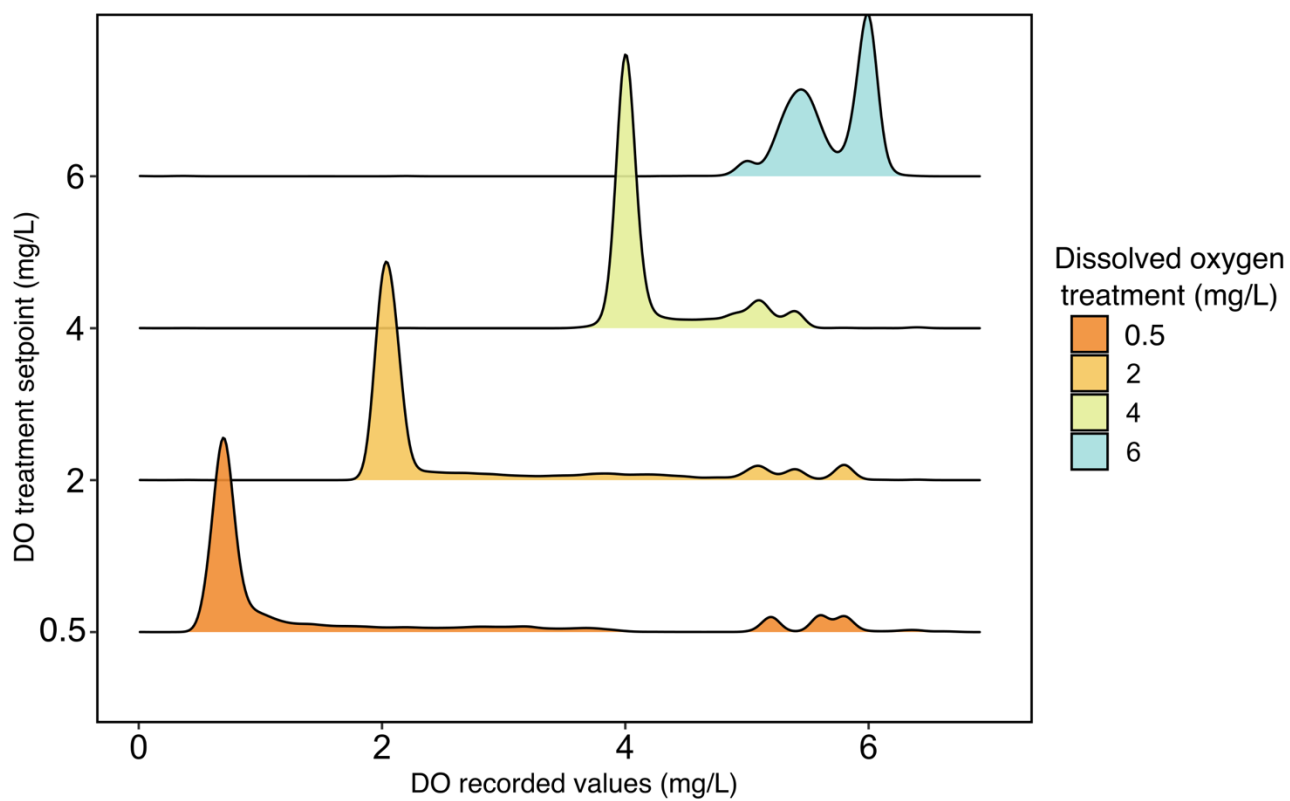

**Supplementary Figure S2.** Histograms of actual dissolved oxygen values recorded throughout the experiment for each treatment setpoint for the experiment duration.

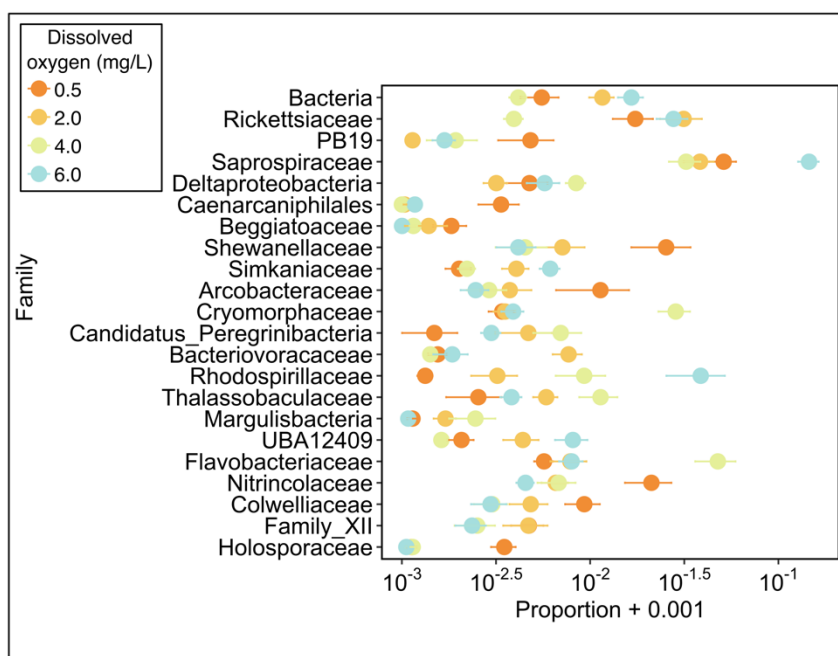

**Supplementary Figure S3.** Proportions of all bacterial families, including those whose rank order do not appear to correlate with oxygen, identified as differentially abundant with an *ANCOM* (Analysis of Composition of Microbiomes) analysis. Family names are shown on the y-axis, and relative abundance is shown on the x-axis.
